# Supplementary material for: Characterizing arrhythmia using machine learning analysis of Ca2+ cycling in human cardiomyocytes
Source: PubMed Central journal article supplement — Stem Cell Reports. 2022 Jul 14;17(8):1810–23. doi: 10.1016/j.stemcr.2022.06.005 (PMC9391413; doi:10.1016/j.stemcr.2022.06.005), 2022-07-14

**BeatToBeat\_M**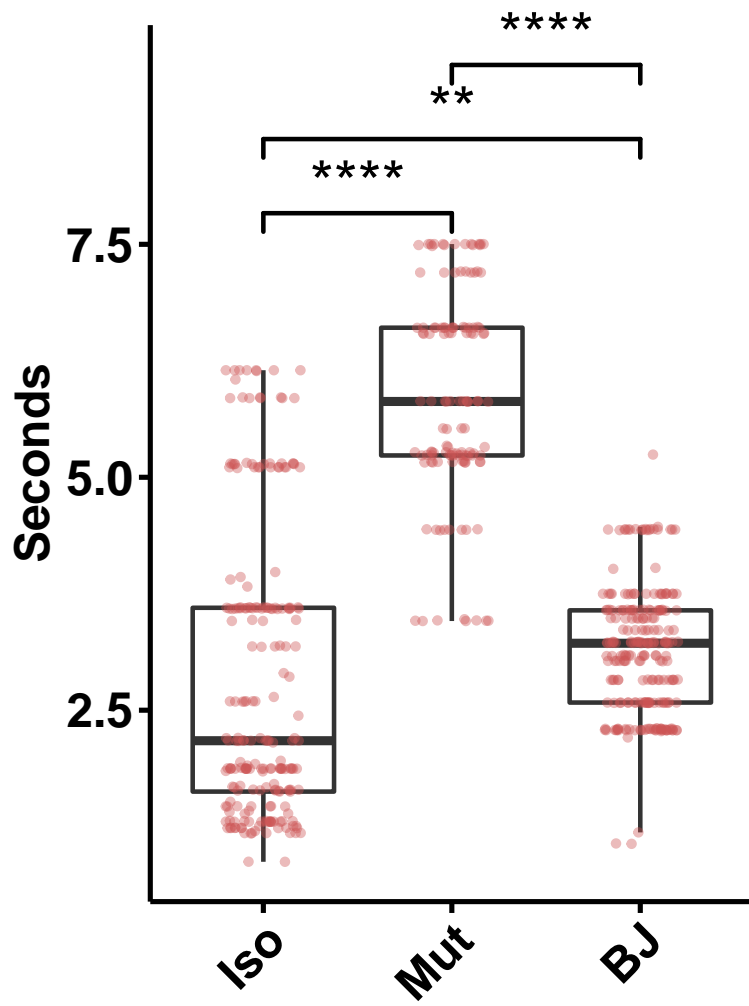**BeatToBeat\_V**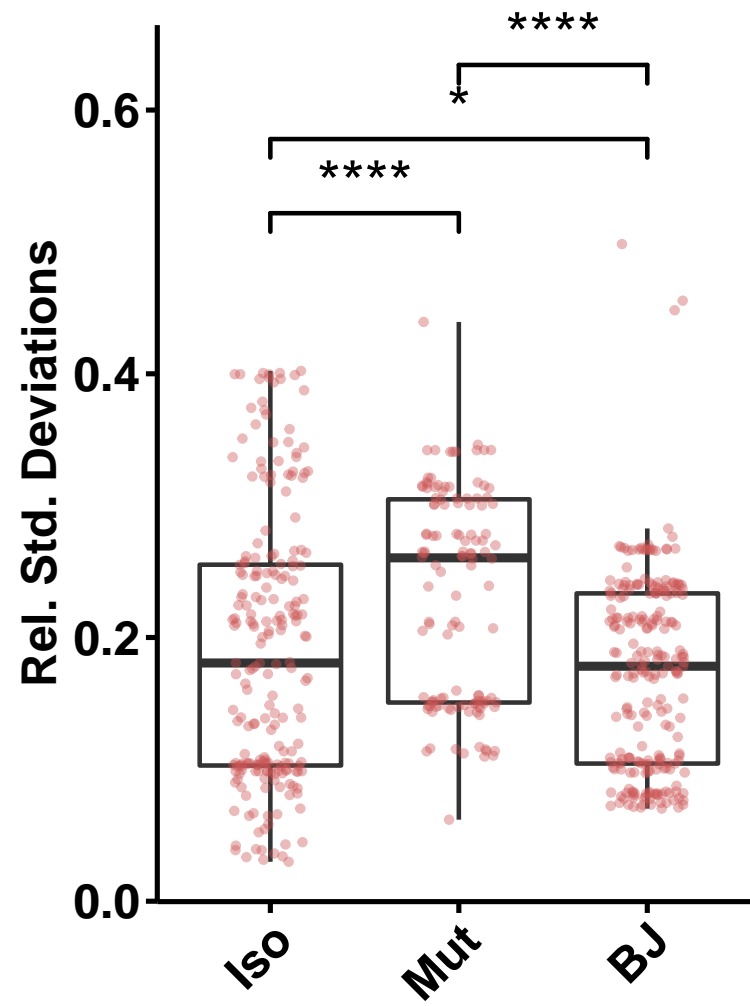**Depolarization\_M**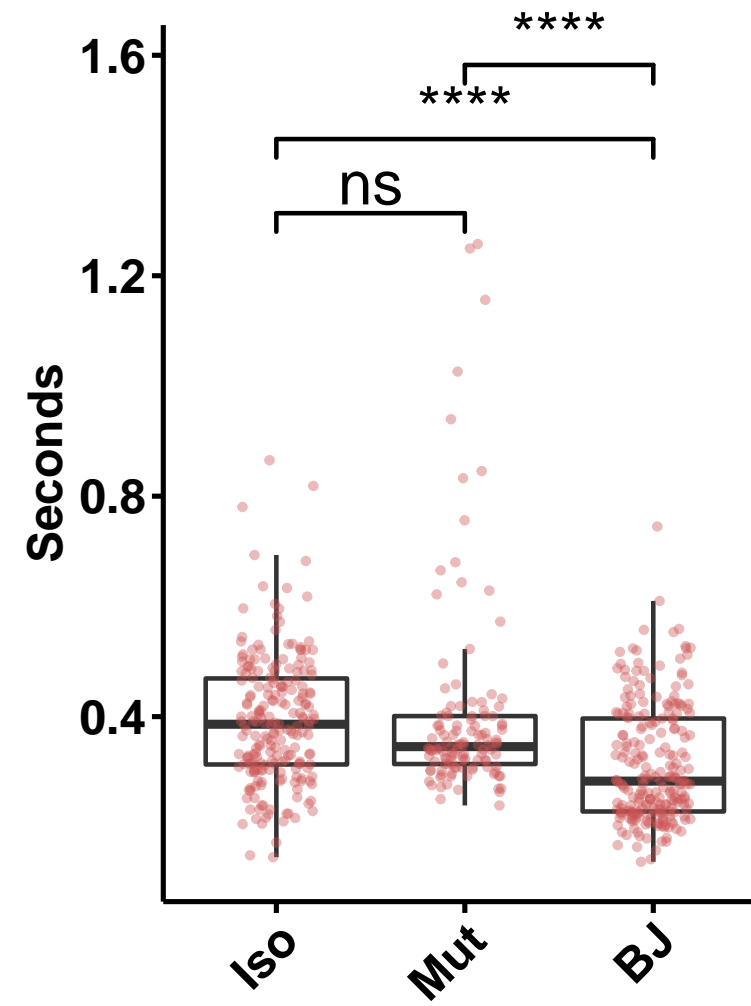**Depolarization\_V**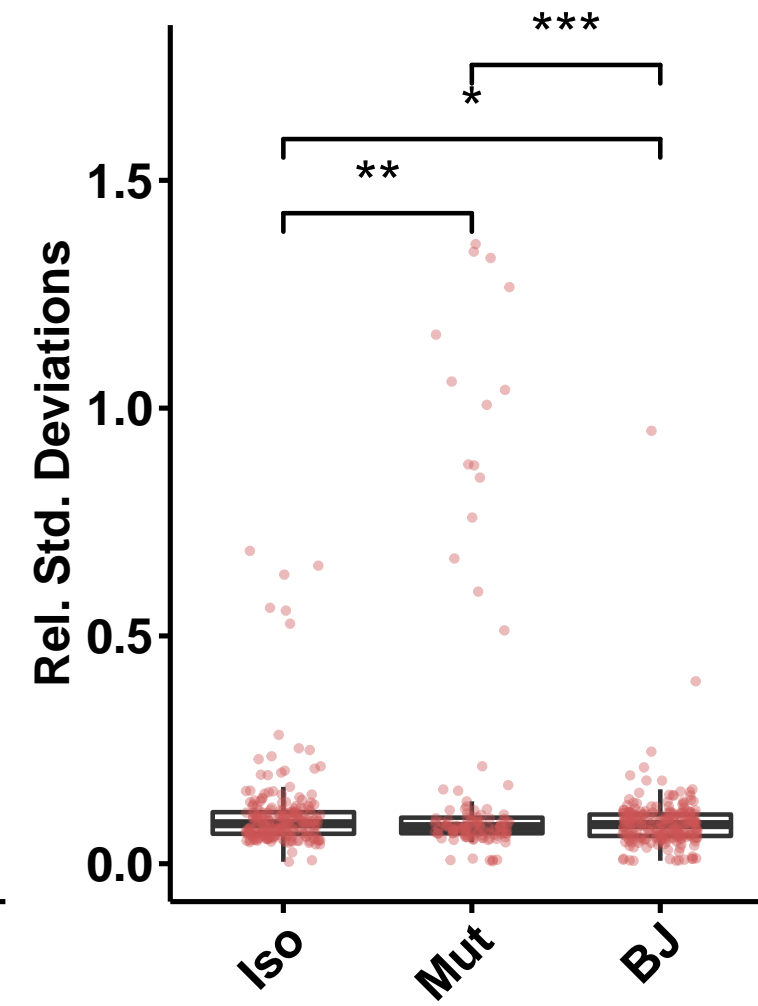**Repolarization30\_M**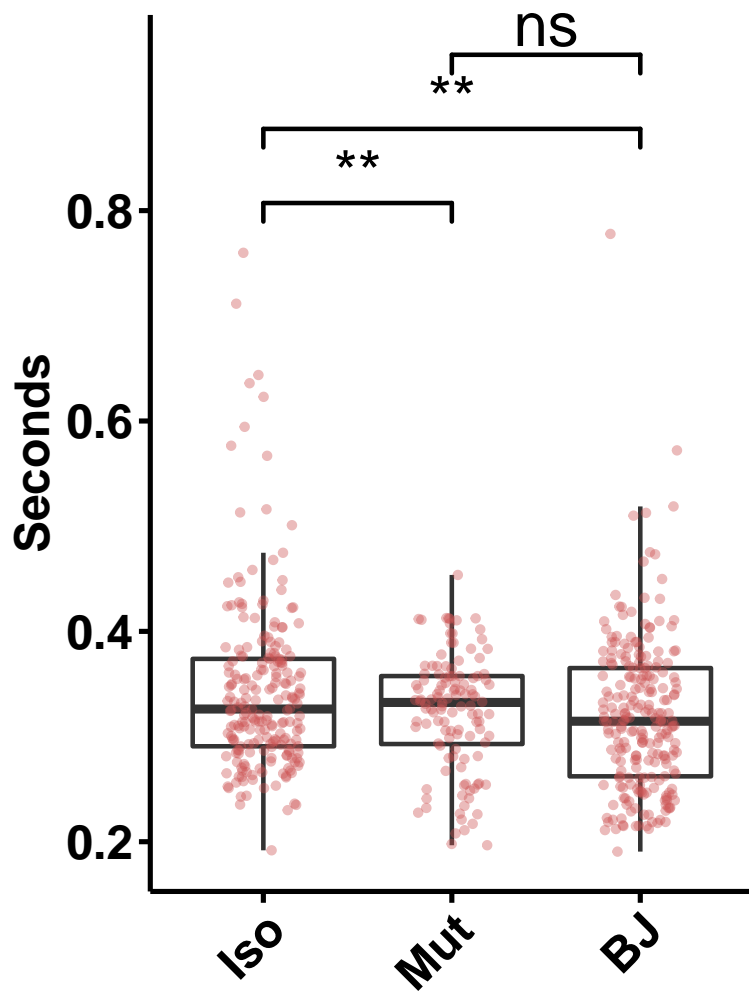**Repolarization60\_M**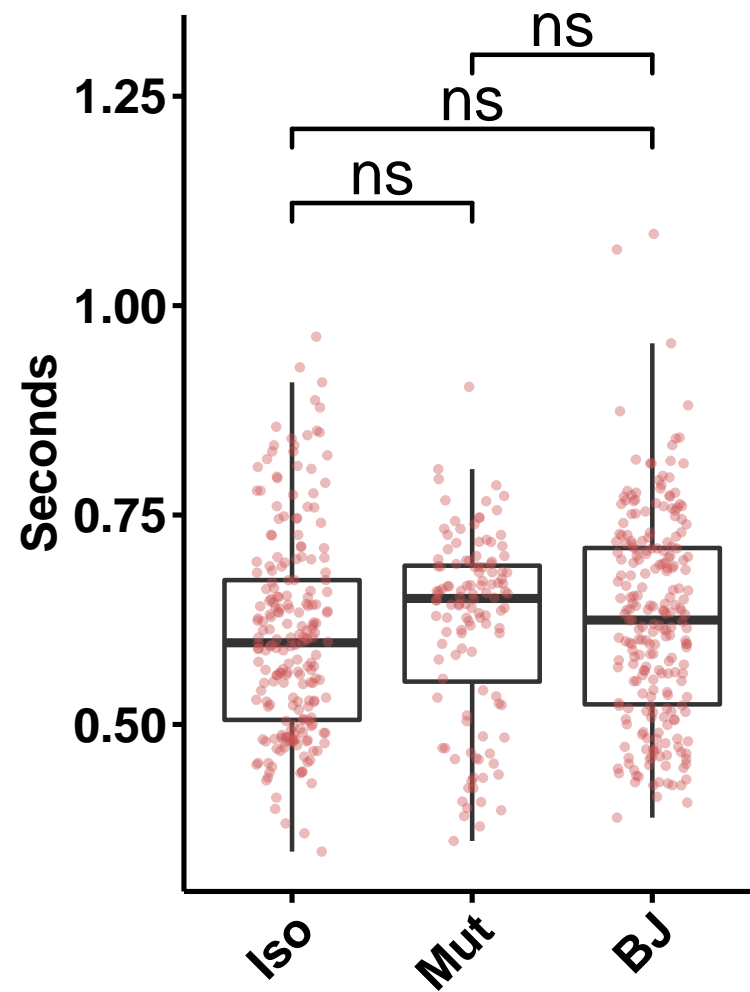**Repolarization90\_M**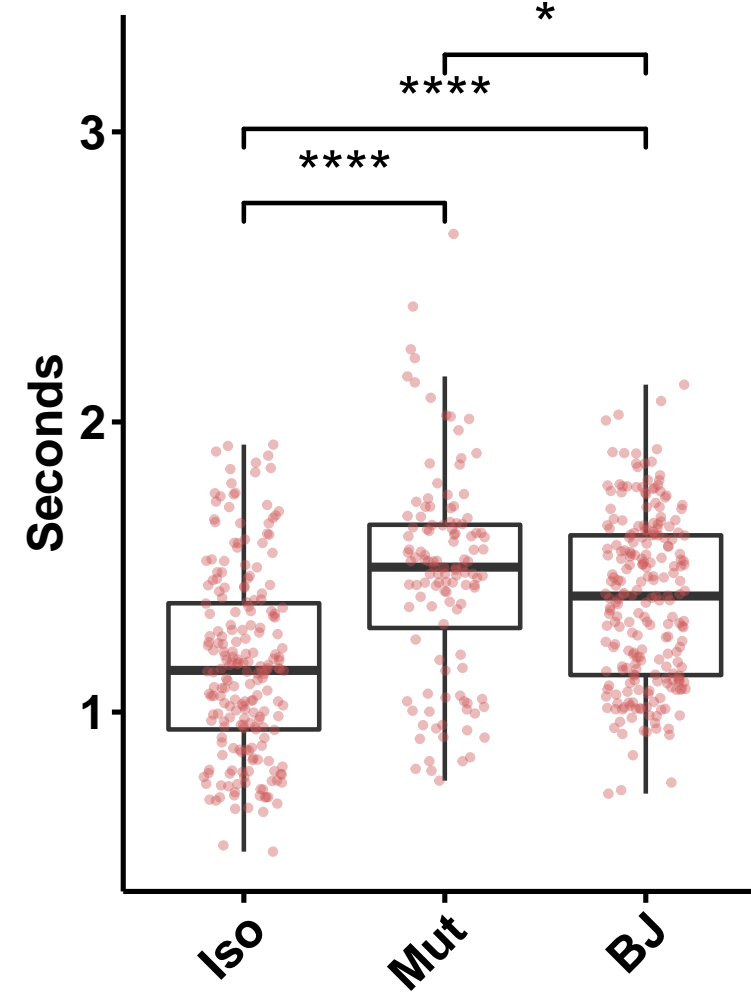**Repolarization90\_V**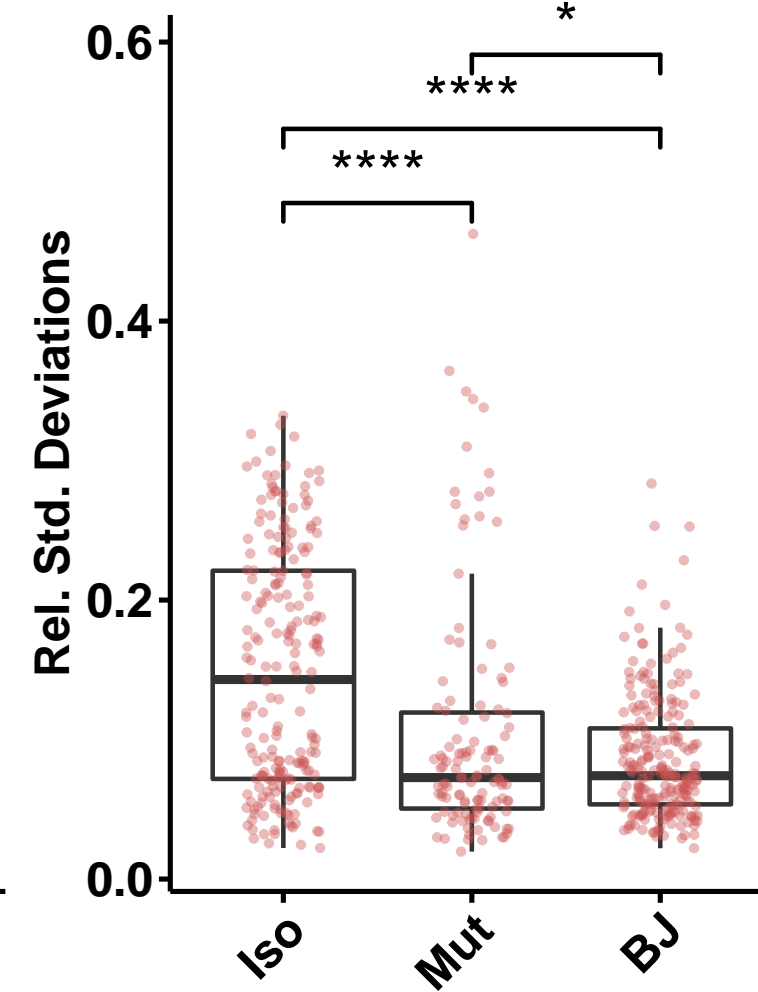

Repolarization30NR90\_M

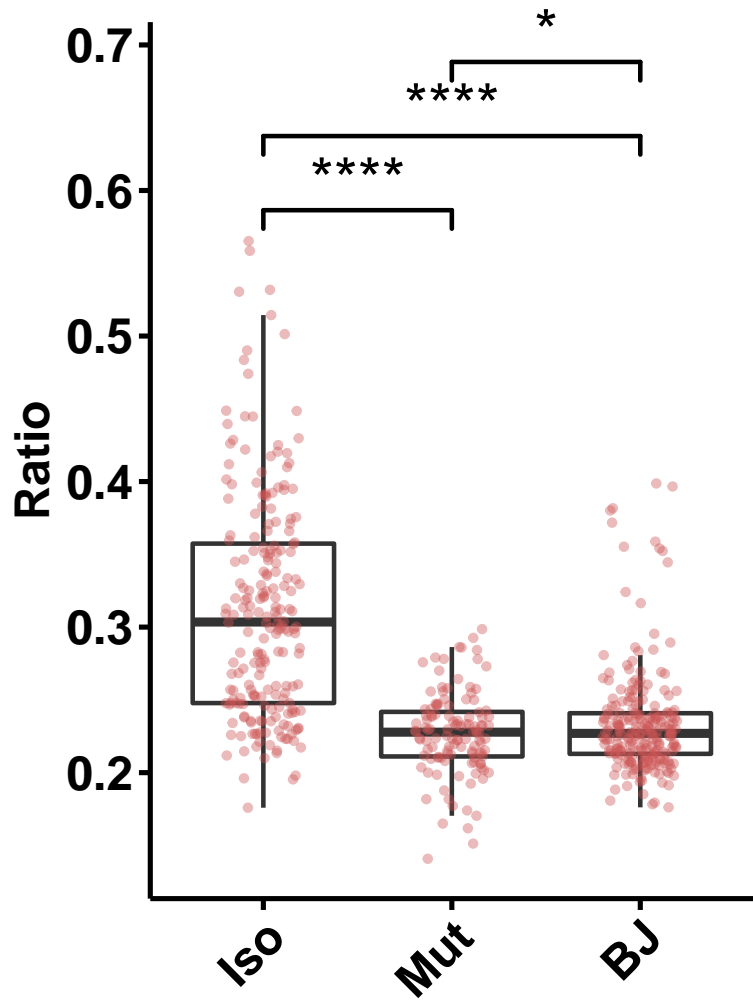

Repolarization30NR90\_V

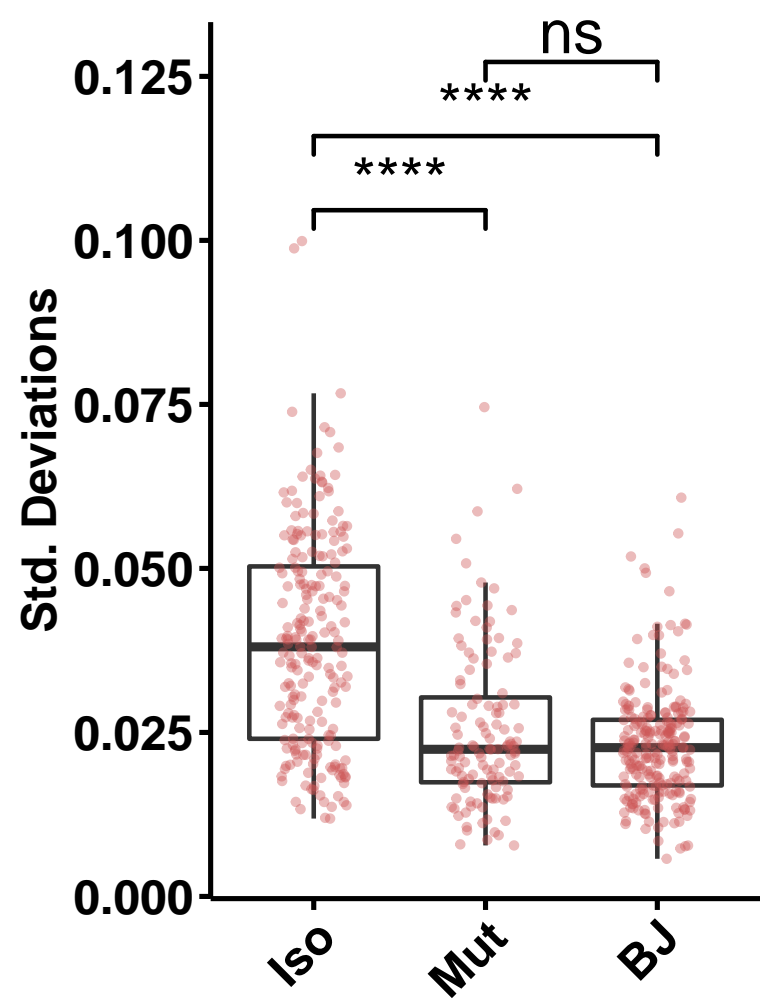

CTD\_M

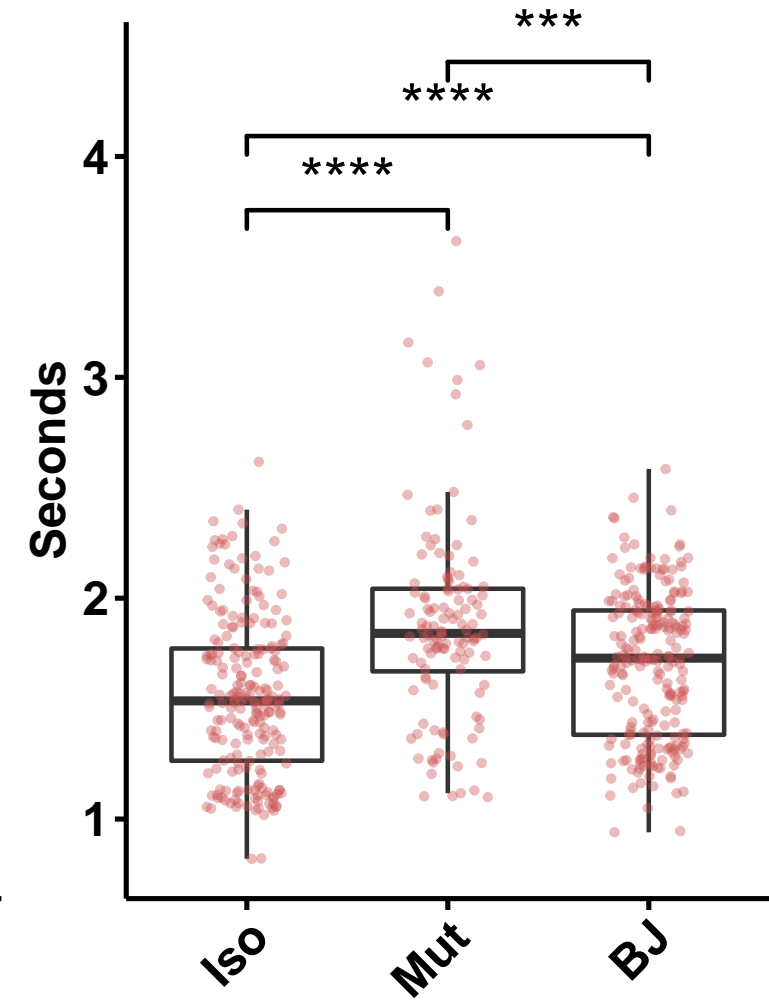

CTD\_V

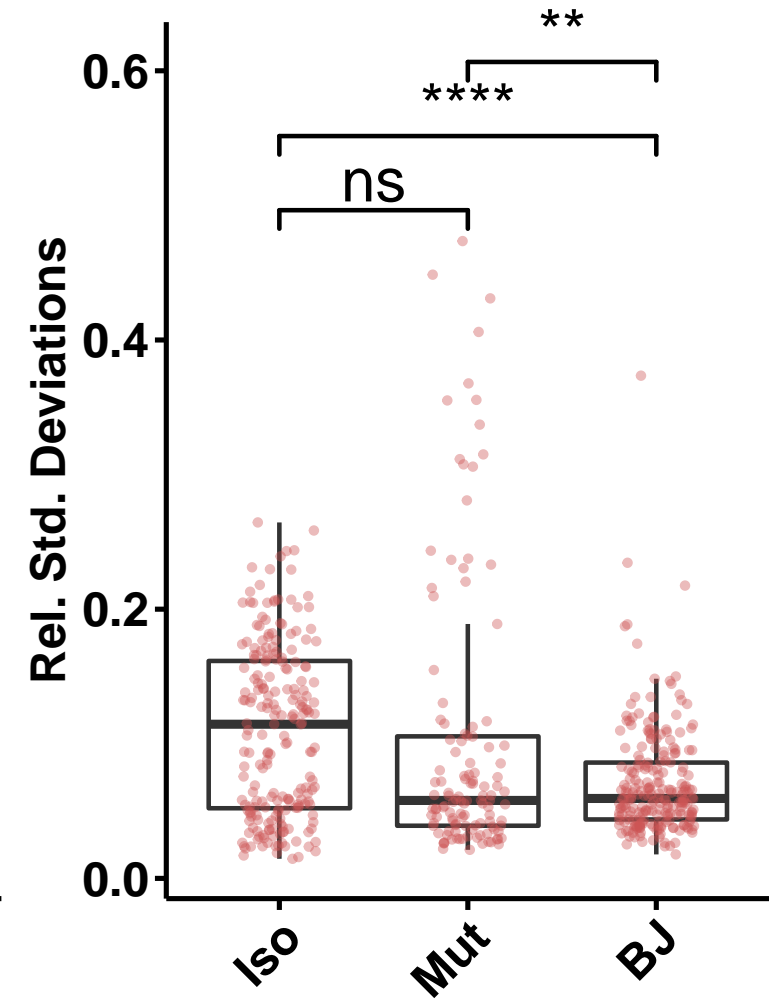

CTDNB\_M

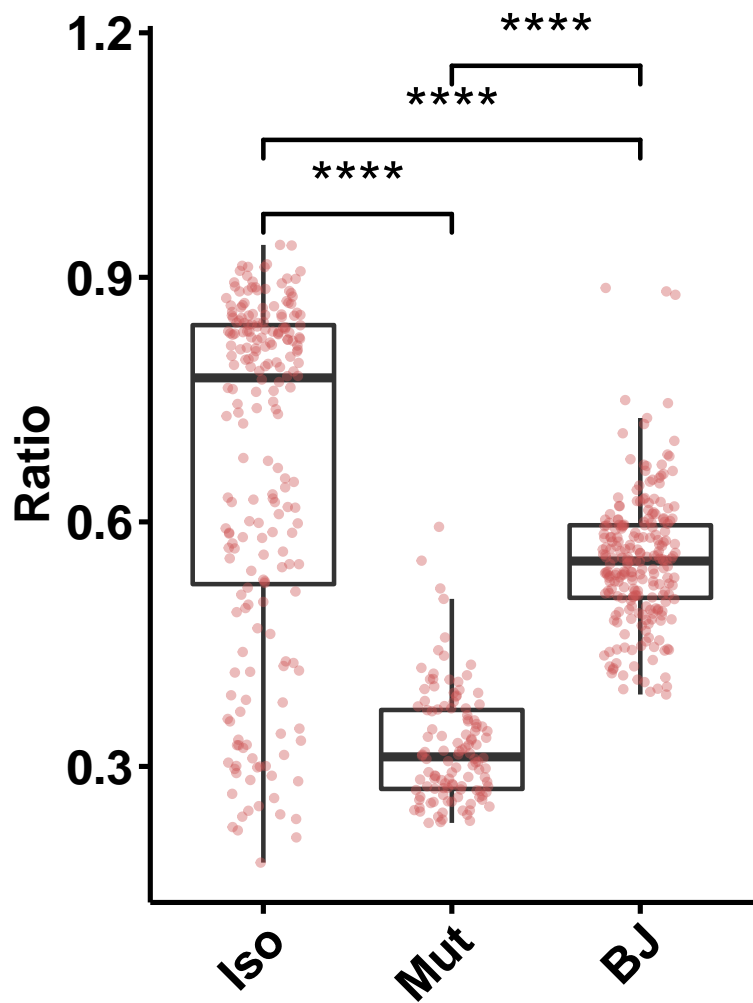

CTDNB\_V

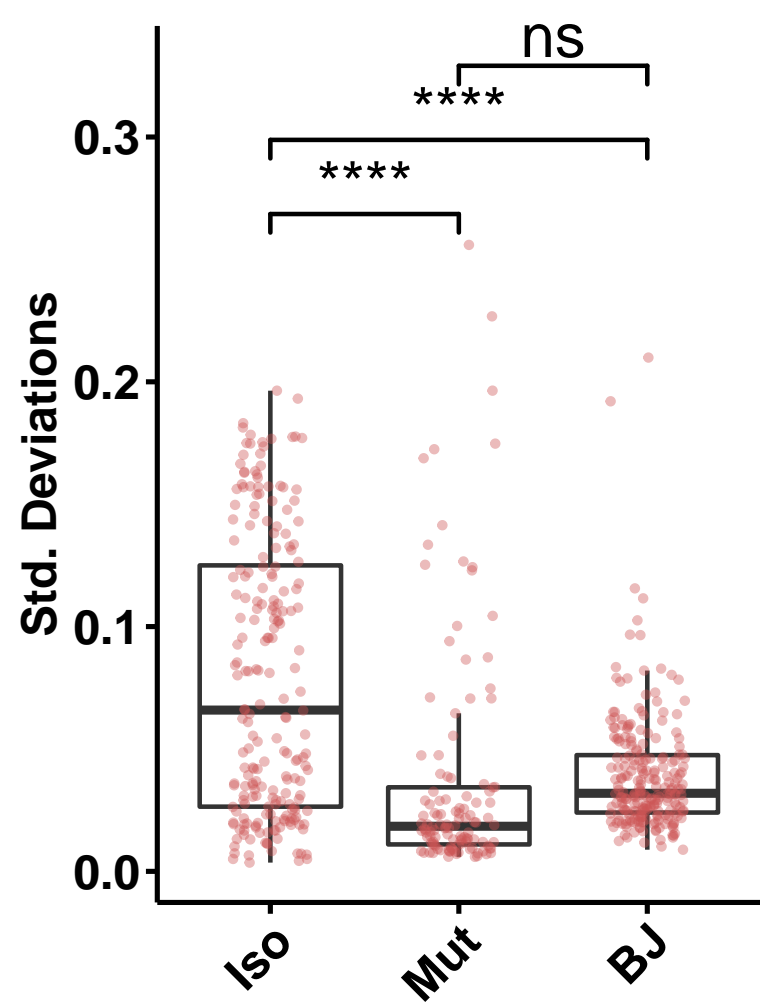

DepolarizationNCTD\_M

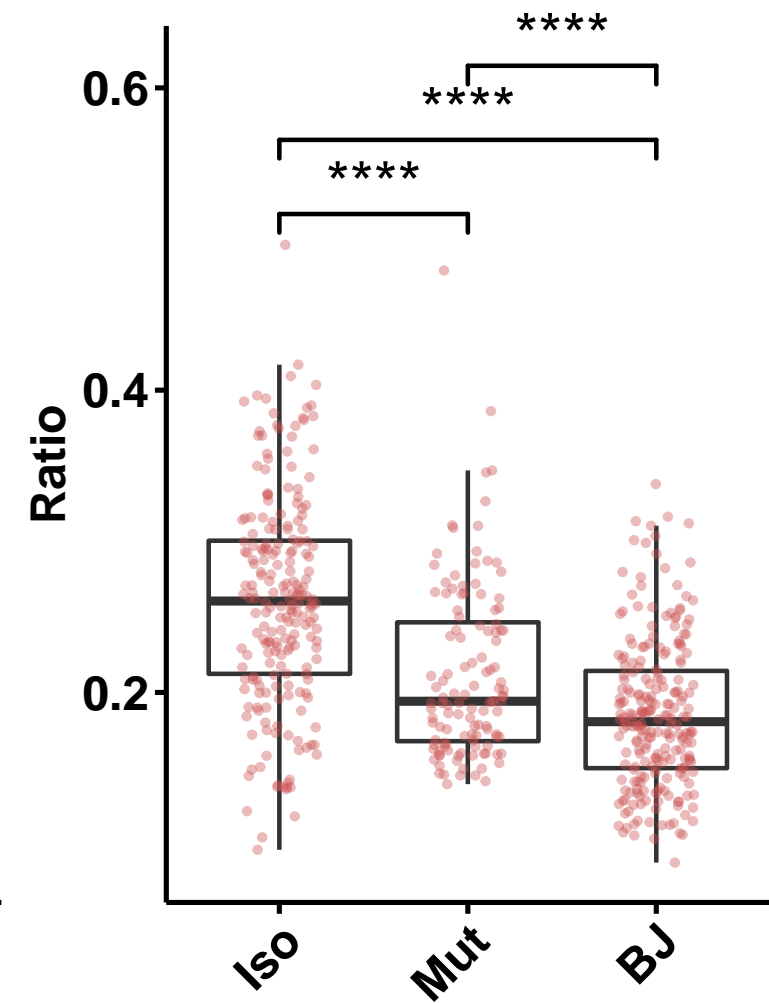

DepolarizationNCTD\_V

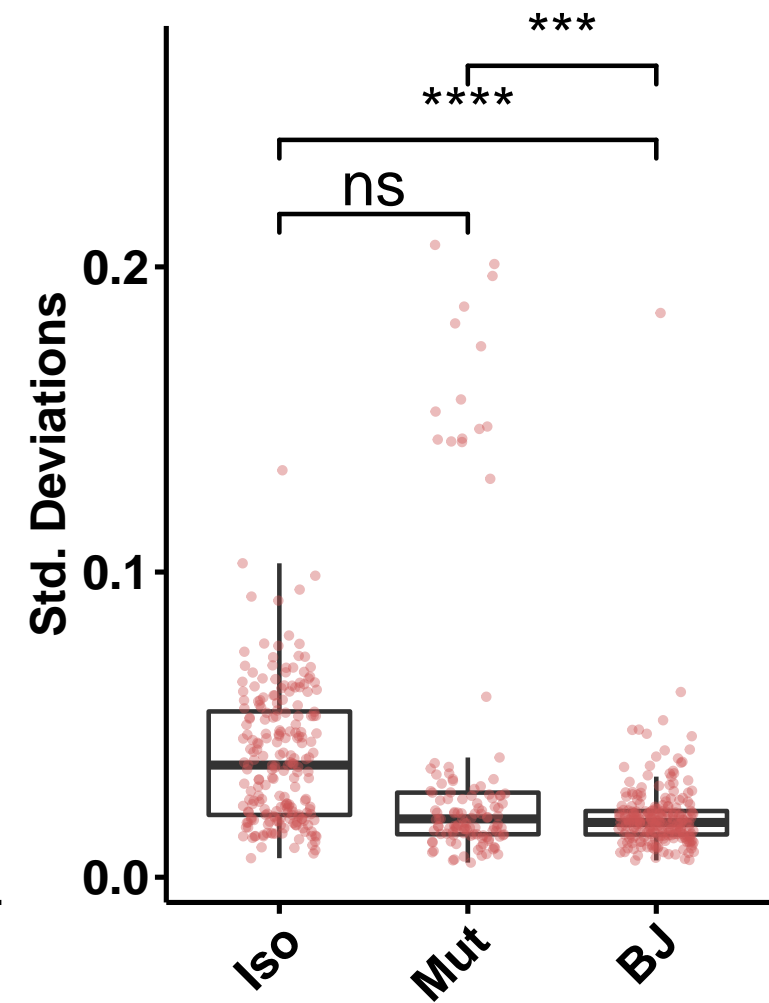

Supplement: mmc5.pdf [file mmc5.pdf]
